# Supplementary material
Source: PubMed Central journal article supplement (PMC5823810)
Supplement: 12192_2018_878_MOESM8_ESM.pdf [file 12192_2018_878_MOESM8_ESM.pdf]

# *Proclamation*

## ***Robert M. Tanguay Day***

**WHEREAS**, on August 15, 2017, a symposium will be held to honor the achievements, dedication, and service of Dr. Robert M. Tanguay to the field of stress response research

**WHEREAS**, Dr. Tanguay received his Ph.D. in Biochemistry from Université Laval and Post-Doctoral study at the Karolinska Institutet, Stockholm, Sweden

**WHEREAS**, Dr. Tanguay is a Professor of the Department of Molecular Biology, Medical Biochemistry and Pathology, Université Laval, Québec Canada

**WHEREAS**, Dr. Tanguay Received in 1999 the "Chimes Bell" Award from the Governor of Hubei Province, P.R. China, and in 2002 was named an Honorary Professor of Tongji Medical College, Wuhan

**WHEREAS**, Dr. Tanguay organized the inaugural Congress of the Cell Stress Society International in 2003 and again in 2011 in Québec

**WHEREAS**, Dr. Tanguay was twice President of the Cell Stress Society International and served six years on Executive Council

**WHEREAS**, Dr. Tanguay was elected in 2015 a senior fellow of the Cell Stress Society International in recognition of his long-standing dedication to our Society and *Cell Stress & Chaperones* journal.

**BE IT RESOLVED THAT I, M. Gabriella Santoro**, current president of the Cell Stress Society International, do hereby proclaim Tuesday, August 15, 2017 as "Robert M. Tanguay Day" for all Society members in recognition of Dr. Tanguay's many contributions to the field of stress response research.

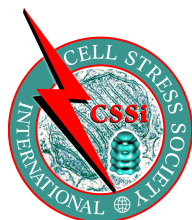

**M. Gabriella Santoro, CSSI President**
